# Supplementary figures and images for: Association of Walnut Consumption with Total and Cause-Specific Mortality and Life Expectancy in U.S. Adults
Source: MDPI journal article supplement (doi:10.3390/nu13082699), 2021-08-04

## Supplementary Material

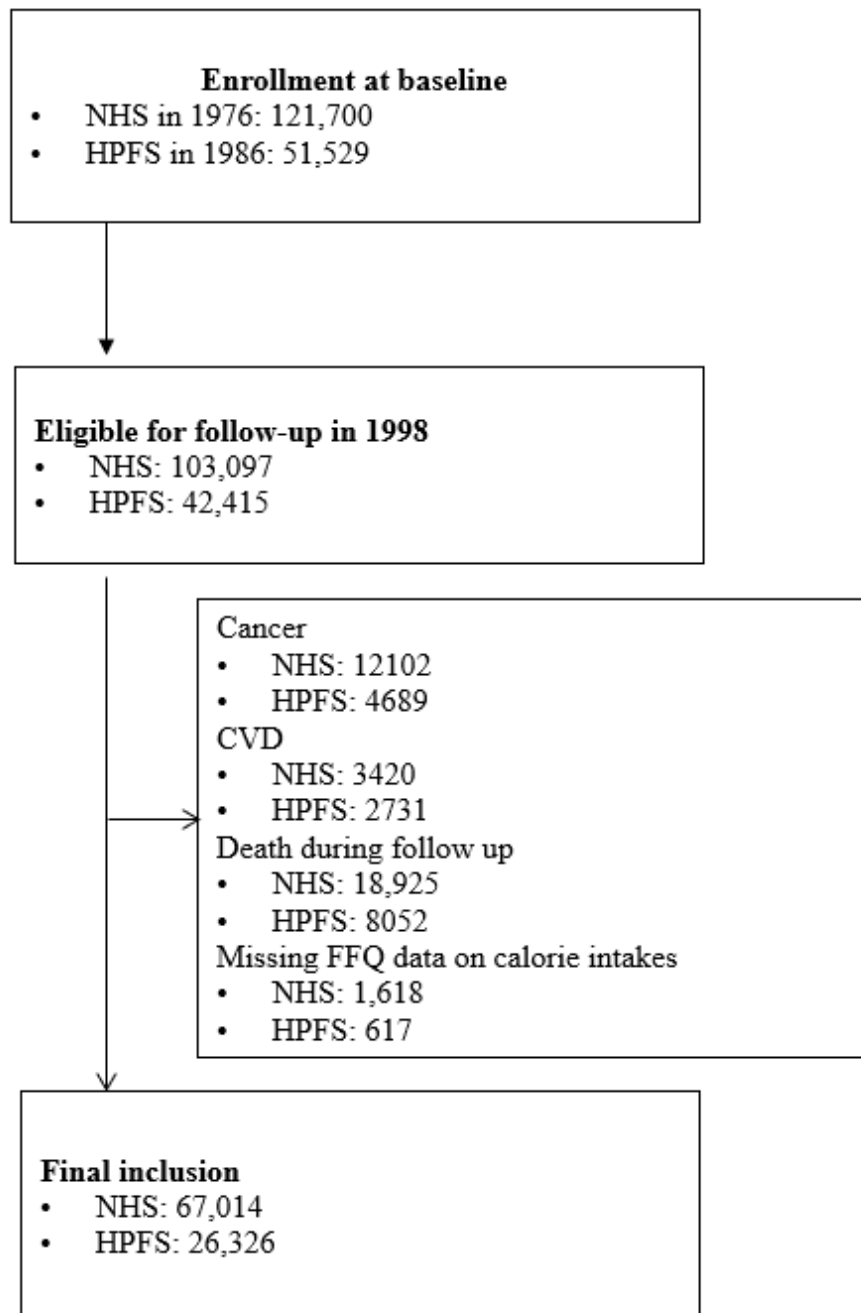

**Figure S1.** Flowchart of participant included in the study.

Supplement: s1 [file s1]
